# Supplementary material
Source: PubMed Central journal article supplement (PMC6543540)
Supplement: NIHMS1010635-supplement-1.pdf [file NIHMS1010635-supplement-1.pdf]

Supplemental Figure 1.

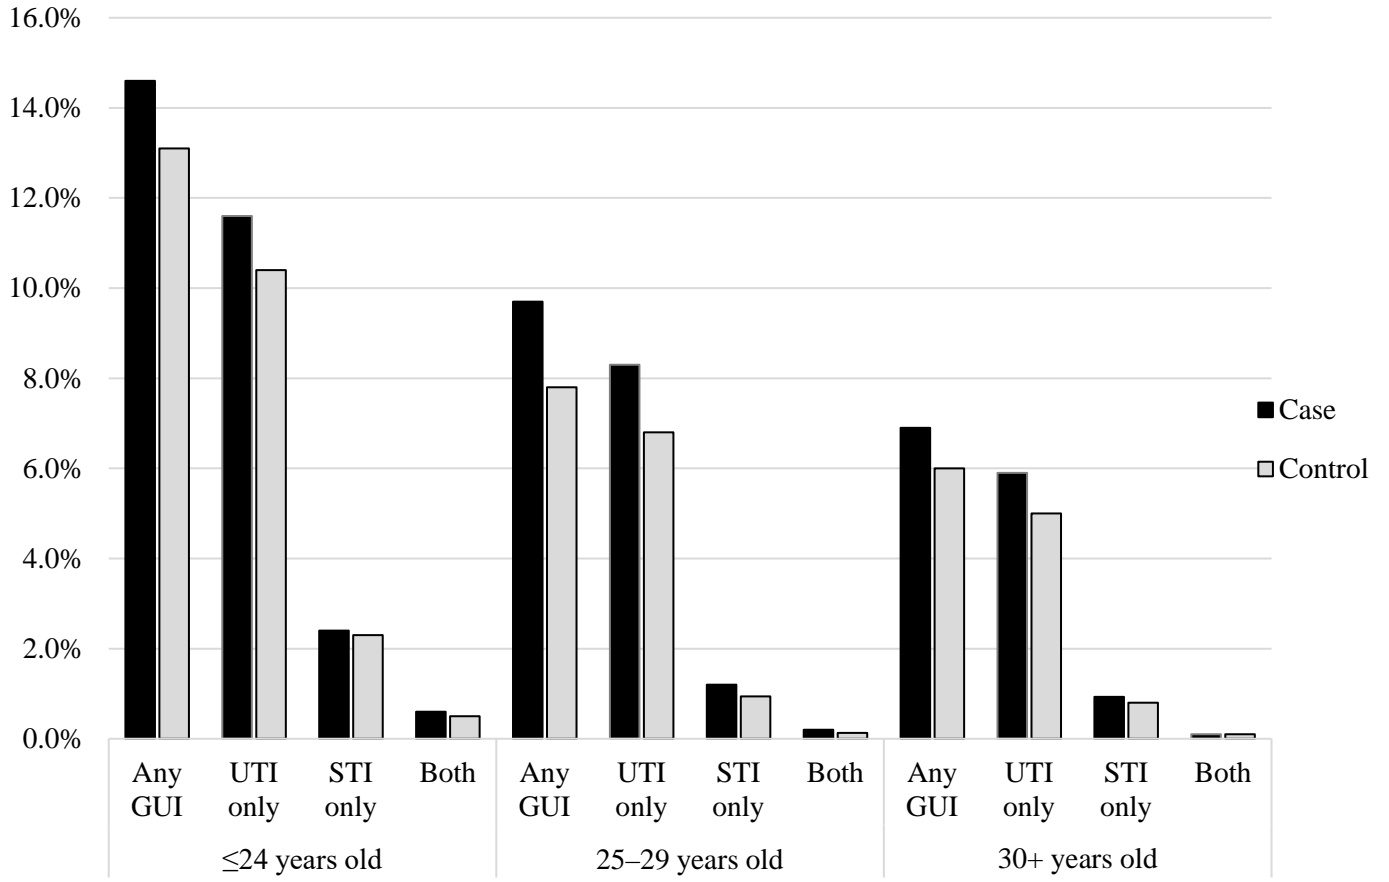

Supplemental Table 1. Associations between periconceptional genitourinary infections and isolated non-cardiac birth defects and simple isolated congenital heart defects, National Birth Defects Prevention Study 1997–2011.

| <b>Birth Defect</b>                                              | <b>Exposed/Unexposed</b> | <b>OR (95% CI)<sup>†</sup></b> |
|------------------------------------------------------------------|--------------------------|--------------------------------|
| Controls <sup>‡</sup>                                            | 1,014/10,531             |                                |
| <b><i>Non-cardiac birth defects</i></b>                          |                          |                                |
| Amniotic band sequence                                           | 31/246                   | 1.13 (0.76, 1.68)              |
| Anencephaly                                                      | 71/490                   | <b>1.36 (1.03, 1.80)</b>       |
| Spina bifida                                                     | 115/999                  | 1.12 (0.90, 1.39)              |
| Encephalocele                                                    | 20/143                   | 1.36 (0.82, 2.25)              |
| Holoprosencephaly                                                | 14/99                    | 1.49 (0.84, 2.64)              |
| Dandy–Walker malformation                                        | 9/99                     | 0.98 (0.49, 1.96)              |
| Hydrocephaly                                                     | 37/302                   | 1.18 (0.82, 1.70)              |
| Cerebellar hypoplasia                                            | 3/33                     | 0.94 (0.18, 3.02)              |
| Anophthalmia/microphthalmia                                      | 14/117                   | 1.21 (0.69, 2.14)              |
| Congenital cataracts                                             | 34/271                   | 1.40 (0.97, 2.03)              |
| Glaucoma                                                         | 18/130                   | 1.48 (0.87, 2.53)              |
| Anotia/microtia                                                  | 54/415                   | 1.22 (0.88, 1.68)              |
| Choanal atresia                                                  | 7/76                     | 1.11 (0.48, 2.60)              |
| Cleft palate only                                                | 110/1,156                | 1.02 (0.82, 1.26)              |
| Cleft lip only                                                   | 108/893                  | <b>1.32 (1.06, 1.64)</b>       |
| Cleft lip with cleft palate                                      | 180/1523                 | 1.16 (0.97, 1.39)              |
| Esophageal atresia                                               | 15/301                   | 0.58 (0.34, 1.01)              |
| Duodenal atresia/stenosis                                        | 23/126                   | <b>2.05 (1.29, 3.24)</b>       |
| Small intestinal atresia/stenosis                                | 54/352                   | <b>1.60 (1.17, 2.17)</b>       |
| Colonic atresia/stenosis                                         | 11/41                    | <b>2.24 (1.09, 4.58)</b>       |
| Anorectal atresia/stenosis                                       | 45/404                   | 1.02 (0.73, 1.43)              |
| Biliary atresia                                                  | 12/155                   | 0.83 (0.44, 1.54)              |
| Hypospadias                                                      | 191/2,078                | 1.09 (0.90, 1.31)              |
| Renal agenesis/hypoplasia                                        | 20/107                   | 1.64 (0.98, 2.75)              |
| Bladder exstrophy                                                | 4/50                     | 0.83 (0.22, 2.27)              |
| Cloacal exstrophy                                                | 9/49                     | <b>2.32 (1.11, 4.86)</b>       |
| Longitudinal limb deficiency                                     | 35/253                   | 1.35 (0.93, 1.97)              |
| Transverse limb deficiency                                       | 67/522                   | <b>1.36 (1.04, 1.79)</b>       |
| Craniosynostosis                                                 | 113/1,318                | 0.97 (0.79, 1.20)              |
| Diaphragmatic hernia                                             | 70/581                   | 1.26 (0.96, 1.65)              |
| Omphalocele                                                      | 23/232                   | 1.06 (0.68, 1.67)              |
| Sacral agenesis                                                  | 0/3                      | NC                             |
| <b><i>Congenital heart defects</i></b>                           |                          |                                |
| <b><i>Conotruncal heart defects</i></b>                          |                          |                                |
| Truncus arteriosus                                               | 10/73                    | 1.52 (0.77, 2.99)              |
| Tetralogy of Fallot                                              | 79/842                   | 1.02 (0.79, 1.31)              |
| d-TGA                                                            | 49/510                   | 0.95 (0.69, 1.32)              |
| DORV-TGA <sup>§</sup>                                            | 6/46                     | 1.35 (0.47, 3.19)              |
| Other DORV                                                       | 4/26                     | 1.60 (0.40, 4.62)              |
| Conoventricular VSD <sup>§</sup>                                 | 8/42                     | 2.06 (0.83, 4.46)              |
| Atrioventricular septal defect                                   | 21/146                   | 1.55 (0.97, 2.49)              |
| Total anomalous pulmonary venous return                          | 16/230                   | 0.71 (0.42, 1.21)              |
| <b><i>Left ventricular outflow tract obstruction defects</i></b> |                          |                                |
| Hypoplastic left heart syndrome                                  | 64/501                   | <b>1.37 (1.04, 1.81)</b>       |
| Coarctation of the aorta                                         | 54/488                   | 1.35 (1.00, 1.82)              |

|                                                            |          |                          |
|------------------------------------------------------------|----------|--------------------------|
| Aortic valve stenosis                                      | 20/313   | 0.66 (0.40, 1.07)        |
| <i>Right ventricular outflow tract obstruction defects</i> |          |                          |
| Pulmonary atresia                                          | 15/149   | 0.96 (0.54, 1.70)        |
| Pulmonary valve stenosis                                   | 92/938   | 1.00 (0.79, 1.27)        |
| Tricuspid atresia                                          | 5/65     | 0.80 (0.32, 2.02)        |
| Ebstein anomaly                                            | 11/99    | 1.11 (0.57, 2.16)        |
| <i>Septal defects</i>                                      |          |                          |
| Perimembranous VSD                                         | 70/750   | 0.99 (0.76, 1.30)        |
| Muscular VSD <sup>§</sup>                                  | 10/129   | 0.80 (0.36, 1.62)        |
| Secundum atrial septal defect                              | 178/1305 | <b>1.22 (1.02, 1.47)</b> |

OR=odds ratio, CI=confidence interval, NC=not calculated, TGA=transposition of the great arteries, DORV=double outlet right ventricle, VSD=ventricular septal defect

<sup>†</sup> For defects with 5+ exposed cases, estimates were adjusted for maternal age, race/ethnicity, and state of residence at the time of infant's birth. Counts in the adjusted analysis were slightly lower than presented due to missing values for some covariates. Crude ORs with exact 95% CIs are presented for defects with 3–4 exposed cases. Estimates are not presented for analyses based on < 3 exposed cases. Infants of mothers who did not report any thyroid medication use were the reference group.

<sup>‡</sup> The number of controls differed for the following birth defects analyses: congenital cataracts and glaucoma (865 exposed and 8,971 unexposed controls), clefts (1,001 exposed and 10,409 unexposed controls), hypospadias (521 exposed and 5,366 unexposed male controls), pulmonary valve stenosis (964 exposed and 10,116 unexposed controls) conoventricular and perimembranous VSDs (568 exposed and 6,130 unexposed controls), and muscular VSDs (63 exposed and 648 unexposed controls).

<sup>§</sup> Adjusted logistic model did not converge; estimates presented are crude OR and exact 95% CIs.

Supplemental Table 2. Odds ratios for associations between any GUI in the three months before pregnancy through the third month of pregnancy and birth defects, National Birth Defects Prevention Study 1997–2011.

| <b>Birth Defects</b>                                             | <b>Exposed/ Unexposed</b> | <b>OR (95% CI)<sup>†</sup></b> |
|------------------------------------------------------------------|---------------------------|--------------------------------|
| Controls <sup>‡</sup>                                            | 1,156/10,388              |                                |
| <b><i>Non-cardiac birth defects</i></b>                          |                           |                                |
| Amniotic band sequence                                           | 43/283                    | 1.15 (0.82, 1.62)              |
| Anencephaly                                                      | 89/536                    | <b>1.33 (1.03, 1.71)</b>       |
| Spina bifida                                                     | 143/1117                  | 1.07 (0.87, 1.30)              |
| Encephalocele                                                    | 32/187                    | <b>1.51 (1.01, 2.25)</b>       |
| Holoprosencephaly                                                | 22/131                    | 1.52 (0.95, 2.42)              |
| Dandy–Walker malformation                                        | 20/158                    | 1.18 (0.73, 1.90)              |
| Hydrocephaly                                                     | 58/425                    | 1.08 (0.80, 1.46)              |
| Cerebellar hypoplasia <sup>§</sup>                               | 7/54                      | 1.17 (0.53, 2.57)              |
| Anophthalmia/microphthalmia                                      | 30/190                    | 1.36 (0.91, 2.04)              |
| Congenital cataracts                                             | 43/303                    | 1.40 (1.00, 1.95)              |
| Glaucoma                                                         | 25/157                    | 1.54 (0.98, 2.43)              |
| Anotia/microtia                                                  | 78/584                    | 1.16 (0.89, 1.51)              |
| Choanal atresia                                                  | 19/138                    | 1.41 (0.84, 2.37)              |
| Cleft palate only                                                | 153/1405                  | 1.02 (0.85, 1.23)              |
| Cleft lip only                                                   | 136/939                   | <b>1.35 (1.11, 1.64)</b>       |
| Cleft lip with cleft palate                                      | 242/1740                  | <b>1.17 (1.01, 1.37)</b>       |
| Esophageal atresia                                               | 83/657                    | 1.25 (0.98, 1.60)              |
| Duodenal atresia/stenosis                                        | 39/197                    | <b>1.86 (1.30, 2.67)</b>       |
| Small intestinal atresia/stenosis                                | 68/406                    | <b>1.52 (1.16, 2.01)</b>       |
| Colonic atresia/stenosis                                         | 12/46                     | 1.89 (0.96, 3.73)              |
| Anorectal atresia/stenosis                                       | 123/913                   | 1.11 (0.90, 1.37)              |
| Biliary atresia                                                  | 20/173                    | 1.09 (0.67, 1.78)              |
| Hypospadias                                                      | 245/2288                  | 1.06 (0.90, 1.26)              |
| Renal agenesis                                                   | 27/153                    | 1.28 (0.82, 2.01)              |
| Bladder exstrophy                                                | 7/65                      | 1.03 (0.47, 2.27)              |
| Cloacal exstrophy                                                | 11/88                     | 1.21 (0.64, 2.30)              |
| Longitudinal limb deficiency                                     | 62/438                    | 1.16 (0.87, 1.54)              |
| Transverse limb deficiency                                       | 92/612                    | <b>1.36 (1.07, 1.72)</b>       |
| Craniosynostosis                                                 | 143/1430                  | 0.98 (0.81, 1.18)              |
| Diaphragmatic hernia                                             | 106/749                   | 1.25 (1.00, 1.57)              |
| Omphalocele                                                      | 46/383                    | 1.08 (0.78, 1.49)              |
| Sacral agenesis                                                  | 11/64                     | 1.58 (0.81, 3.07)              |
| <b><i>Congenital heart defects</i></b>                           |                           |                                |
| <b><i>Conotruncal defects</i></b>                                |                           |                                |
| Truncus arteriosus                                               | 17/106                    | 1.42 (0.83, 2.43)              |
| Tetralogy of Fallot                                              | 123/1039                  | 1.12 (0.91, 1.37)              |
| D-TGA                                                            | 80/671                    | 1.05 (0.81, 1.35)              |
| DORV-TGA                                                         | 21/163                    | 1.22 (0.76, 1.94)              |
| Other DORV                                                       | 16/102                    | 1.27 (0.71, 2.24)              |
| Conoventricular VSD                                              | 20/90                     | <b>2.37 (1.43, 3.94)</b>       |
| Atrioventricular septal defect                                   | 56/295                    | <b>1.68 (1.24, 2.28)</b>       |
| Total anomalous pulmonary venous return                          | 21/273                    | 0.68 (0.43, 1.09)              |
| <b><i>Left ventricular outflow tract obstruction defects</i></b> |                           |                                |
| Hypoplastic left heart syndrome                                  | 77/559                    | 1.27 (0.98, 1.63)              |
| Coarctation of the aorta                                         | 111/1026                  | 1.04 (0.84, 1.29)              |
| Aortic valve stenosis                                            | 41/458                    | 0.80 (0.57, 1.13)              |

*Right ventricular outflow tract obstruction defects*

|                          |          |                   |
|--------------------------|----------|-------------------|
| Pulmonary atresia        | 26/229   | 0.98 (0.64, 1.51) |
| Pulmonary valve stenosis | 168/1358 | 1.11 (0.92, 1.33) |
| Tricuspid atresia        | 16/153   | 0.90 (0.51, 1.57) |
| Ebstein anomaly          | 20/159   | 1.14 (0.70, 1.85) |

*Septal defects*

|                               |          |                          |
|-------------------------------|----------|--------------------------|
| Perimembranous VSD            | 130/1214 | 0.98 (0.80, 1.21)        |
| Muscular VSD                  | 19/164   | 1.00 (0.57, 1.78)        |
| Secundum atrial septal defect | 379/2564 | <b>1.22 (1.07, 1.40)</b> |
| Single ventricle defects      | 18/139   | 1.19 (0.71, 2.01)        |
| Heterotaxy                    | 46/275   | 1.39 (0.99, 1.95)        |

---

OR=odds ratio, CI=confidence interval, NC=not calculated, TGA=transposition of the great arteries, DORV=double outlet right ventricle, VSD=ventricular septal defect

† For defects with 5+ exposed cases, estimates were adjusted for maternal age, race/ethnicity, and state of residence at the time of infant's birth. Counts in the adjusted analysis were slightly lower than presented due to missing values for some covariates. Crude ORs with exact 95% CIs are presented for defects with 3–4 exposed cases. Estimates are not presented for analyses based on < 3 exposed cases. Infants of mothers who did not report any thyroid medication use were the reference group.

‡ The number of controls differed for the following analyses: congenital cataracts and glaucoma (987 exposed and 8,847 unexposed controls), clefts (1,143 exposed and 10,266 unexposed controls), hypospadias (595 exposed and 5,290 unexposed male controls), pulmonary valve stenosis (1,096 exposed and 9,983 unexposed controls) conoventricular and perimembranous VSDs (654 exposed and 6,043 unexposed controls), and muscular VSDs (70 exposed and 641 unexposed controls).

§ Adjusted logistic model did not converge; estimates presented are crude OR and exact 95% CIs.
